# Supplementary material
Source: Springer Nature journal article supplement (https://www.springermedizin.de/resource/supplementary/12967_2009_339_MOESM2_ESM.pdf/9576258)

DBP (mg/dL)

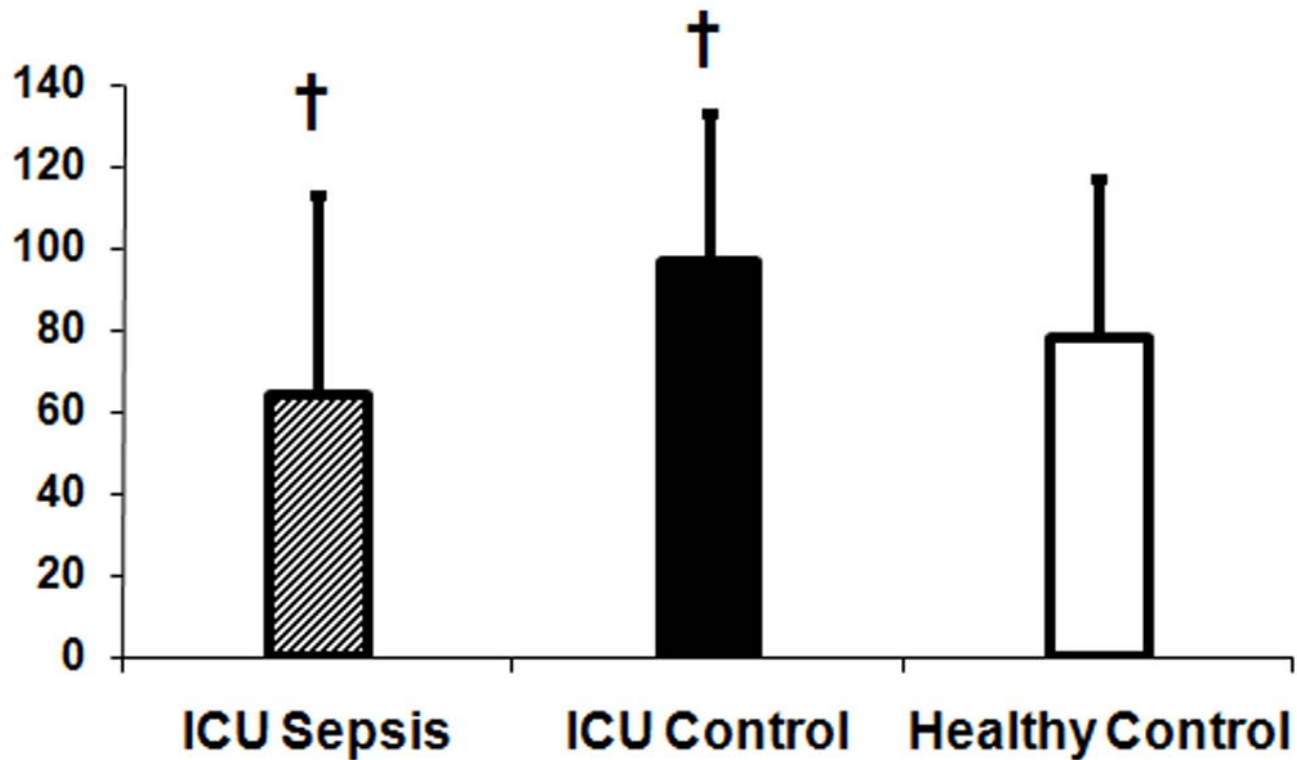

Supplement: MOESM2 [file 9576258]
